# Supplementary material for: Reduced Graphene Oxides Modulate the Expression of Cell Receptors and Voltage-Dependent Ion Channel Genes of Glioblastoma Multiforme
Source: PubMed Central journal article supplement (PMC7825604; doi:10.3390/ijms22020515), 2021-01-06
Supplement: ijms-22-00515-s001.pdf [file ijms-22-00515-s001.pdf]

**Supplementary Materials:**

**Table S1** Changes in the expression of voltage-dependant ion channels in U87 (glioblastoma multiforme cell line) and Hs5 (fibroblast cell line). **Notes:** n.e. means non-expression.

| Cell line     |               | U87            |                |                |              | Hs5            |                |                |              |              |
|---------------|---------------|----------------|----------------|----------------|--------------|----------------|----------------|----------------|--------------|--------------|
| Treatment     |               | Classification | Gene           | RQ             | Log:RQ       | Classification | Gene           | RQ             | Log:RQ       |              |
| GN/ExF        | 6 h           | Upregulated    | <i>CLCN6</i>   | 1,3331979      | 0,400900841  | Upregulated    | <i>CLCN6</i>   | 1,016570355    | 0,021419525  |              |
|               |               |                | <i>KCNE4</i>   | 1,122563279    | 0,146626949  |                | <i>NALCN</i>   | 2,958499955    | 0,841217359  |              |
|               |               |                | <i>CLCN3</i>   | 1,89793895     | 0,742386182  |                | <i>CACNA1D</i> | 1,372780285    | 0,424427986  |              |
|               |               |                | <i>CACNA1B</i> | 2,744087912    | 1,204350662  |                | <i>KCNJ10</i>  | 2,061654764    | 0,952134768  |              |
|               |               |                | <i>NALCN</i>   | 1,125816509    | 0,159136772  |                | <i>KCNB1</i>   | 1,023783232    | 0,028834343  |              |
|               |               |                | <i>KCNJ10</i>  | 1,288103191    | 0,160208066  |                | <i>CLCN3</i>   | 0,838584717    | -0,358846982 |              |
|               |               |                | <i>KCNB1</i>   | 1,177100265    | 0,034480572  |                | <i>CACNA1B</i> | 0,687431891    | -0,968313217 |              |
|               | 24 h          | Upregulated    | Upregulated    | <i>CACNA1D</i> | n.e.         | n.e.           | Downregulated  | <i>KCNE4</i>   | 1,020293525  | -0,011341095 |
|               |               |                |                | <i>CLCN6</i>   | 1,092756053  | 0,113399188    |                | <i>CLCN6</i>   | 1,192931597  | 0,204937935  |
|               |               |                |                | <i>CLCN3</i>   | 1,663099571  | 0,63972187     |                | <i>CLCN3</i>   | 1,187820858  | 0,122150421  |
|               |               |                |                | <i>CACNA1B</i> | 2,401439607  | 0,615292549    |                | <i>CACNA1B</i> | 1,22040526   | 0,21636041   |
|               |               |                |                | <i>NALCN</i>   | 1,566559326  | 0,644545237    |                | <i>NALCN</i>   | 18,69398059  | 3,323841095  |
|               |               |                |                | <i>KCNB1</i>   | 1,583914535  | 0,643200876    |                | <i>KCNJ10</i>  | 2,482231606  | 0,96110789   |
|               |               |                |                | <i>KCNE4</i>   | 0,657972875  | -0,61946735    |                | <i>KCNE4</i>   | 0,840378314  | -0,477552414 |
| Downregulated | Downregulated | Downregulated  | <i>KCNJ10</i>  | 0,556881529    | -1,047450701 | <i>KCNB1</i>   | 0,922932049    | -0,335605621   |              |              |
|               |               |                | <i>CACNA1D</i> | n.e.           | n.e.         | <i>CACNA1D</i> | 0,908556443    | -0,220032374   |              |              |
|               |               |                | <i>CLCN6</i>   | 1,300059571    | 0,367934863  | <i>CACNA1D</i> | 1,849712742    | -0,77661864    |              |              |
|               |               |                | <i>CLCN3</i>   | 2,004422686    | 0,932834307  | <i>NALCN</i>   | 1,659462977    | 0,253767014    |              |              |
| rGO/Term      | 6 h           | Upregulated    | <i>CACNA1B</i> | 10,81710268    | 1,4016325    | Upregulated    | <i>KCNJ10</i>  | 1,344118864    | 0,275710742  |              |
|               |               |                | <i>NALCN</i>   | 1,112613076    | 0,124638875  |                | <i>CLCN6</i>   | 0,932530706    | -0,106302579 |              |
|               |               |                | <i>KCNB1</i>   | 1,219914067    | 0,244347572  |                | <i>CLCN3</i>   | 0,554210394    | -0,890827497 |              |
|               |               |                | <i>KCNE4</i>   | 1,341633907    | 0,368197441  |                | <i>CACNA1B</i> | 0,131362976    | -2,946339607 |              |
|               |               |                | <i>KCNJ10</i>  | 1,144124513    | -0,133036613 |                | <i>KCNB1</i>   | 0,908833993    | -0,14484024  |              |
|               |               |                | <i>CACNA1D</i> | n.e.           | n.e.         |                | <i>KCNE4</i>   | 1,037002155    | -0,077622414 |              |
|               |               |                | <i>CLCN3</i>   | 1,003580365    | 0,000738462  |                | <i>CLCN3</i>   | 1,2777634      | 0,30         |              |
|               | 24 h          | Downregulated  | Downregulated  | <i>CLCN3</i>   | 1,217675556  | 0,25805982     | Downregulated  | <i>CACNA1B</i> | 1,018777877  | 0,004713376  |
|               |               |                |                | <i>NALCN</i>   | 1,25114783   | 0,297418276    |                | <i>NALCN</i>   | 10,75699264  | 3,196584702  |
|               |               |                |                | <i>CACNA1B</i> | 0,351831389  | -1,8005627     |                | <i>KCNE4</i>   | 1,354328026  | 0,356863022  |
|               |               |                |                | <i>KCNJ10</i>  | 0,578512823  | -1,167643865   |                | <i>CLCN6</i>   | 0,840714247  | -0,26        |
|               |               |                |                | <i>KCNB1</i>   | 1,009151031  | -0,141378403   |                | <i>CACNA1D</i> | 0,888942164  | -0,343770345 |
|               |               |                |                | <i>KCNE4</i>   | 0,835495639  | -0,355083466   |                | <i>KCNJ10</i>  | 1,010483985  | -0,265478134 |
|               |               |                |                | <i>CACNA1D</i> | n.e.         | n.e.           |                | <i>KCNB1</i>   | 0,909271447  | -0,20776844  |
| rGO/ATS       | 6 h           | Upregulated    | <i>CLCN6</i>   | 1,343214992    | 0,424389521  | Upregulated    | <i>CLCN6</i>   | 1,396207767    | 0,47530365   |              |
|               |               |                | <i>CLCN3</i>   | 1,329855543    | 0,294888814  |                | <i>CACNA1D</i> | 2,667572338    | 1,140621503  |              |
|               |               |                | <i>CACNA1B</i> | 6,055479992    | 1,984277725  |                | <i>NALCN</i>   | 2,999447093    | 1,008925438  |              |
|               |               |                | <i>KCNJ10</i>  | 2,286408576    | 0,877258937  |                | <i>KCNJ10</i>  | 2,376563053    | 1,088429451  |              |
|               |               |                | <i>KCNE4</i>   | 1,773190548    | 0,820899487  |                | <i>KCNE4</i>   | 1,118353742    | 0,068469524  |              |
|               |               |                | <i>NALCN</i>   | 0,988821753    | -0,02704366  |                | <i>CLCN3</i>   | 0,716009954    | -0,533124606 |              |
|               |               |                | <i>KCNB1</i>   | 0,54167406     | -1,261337757 |                | <i>CACNA1B</i> | 0,22850311     | -2,138197581 |              |
|               | 24 h          | Downregulated  | Downregulated  | <i>CACNA1D</i> | n.e.         | n.e.           | Downregulated  | <i>KCNB1</i>   | 0,663146579  | -0,598874569 |
|               |               |                |                | <i>CLCN6</i>   | 1,064915719  | 0,071888288    |                | <i>CLCN3</i>   | 1,097868277  | 0,093849818  |
|               |               |                |                | <i>CLCN3</i>   | 79,92947918  | 4,671477       |                | <i>CACNA1B</i> | 1,19287179   | 0,220554988  |
|               |               |                |                | <i>NALCN</i>   | 6,835126445  | 2,468915304    |                | <i>NALCN</i>   | 9,258582354  | 2,418137868  |
|               |               |                |                | <i>KCNJ10</i>  | 1,82768721   | 0,711835225    |                | <i>KCNJ10</i>  | 1,819976294  | 0,77433904   |
|               |               |                |                | <i>KCNB1</i>   | 2,430575382  | 1,204109192    |                | <i>KCNE4</i>   | 1,104428115  | 0,122511864  |
|               |               |                |                | <i>KCNE4</i>   | 2,396475045  | 1,242078781    |                | <i>CLCN6</i>   | 0,902238748  | -0,150525729 |
| rGO/TUD       | 6 h           | Upregulated    | <i>CACNA1B</i> | 0,481708549    | -1,866898219 | Upregulated    | <i>CACNA1D</i> | 0,605564771    | -0,785147985 |              |
|               |               |                | <i>CLCN6</i>   | 1,314329253    | 0,386397362  |                | <i>KCNB1</i>   | 0,612232986    | -0,924949646 |              |
|               |               |                | <i>CLCN3</i>   | 2,312135547    | 1,137585322  |                | <i>CLCN6</i>   | 1,206013254    | 0,264055888  |              |
|               |               |                | <i>NALCN</i>   | 1,088084495    | 0,087058385  |                | <i>CACNA1D</i> | 3,293277232    | 1,367697398  |              |
|               |               |                | <i>KCNJ10</i>  | 1,313874157    | 0,25367101   |                | <i>KCNJ10</i>  | 2,303738053    | 0,961934408  |              |
|               |               |                | <i>KCNB1</i>   | 1,158837812    | 0,162621498  |                | <i>CLCN3</i>   | 0,852644485    | -0,252981186 |              |
|               |               |                | <i>CACNA1B</i> | 8,889092861    | -1,275837072 |                | <i>CACNA1B</i> | 0,208935779    | -2,276677767 |              |
|               | 24 h          | Downregulated  | Downregulated  | <i>KCNE4</i>   | 0,982379429  | -0,030621529   | Downregulated  | <i>NALCN</i>   | 0,817521193  | -0,825876236 |
|               |               |                |                | <i>CACNA1D</i> | n.e.         | n.e.           |                | <i>KCNB1</i>   | 0,949172443  | -0,113222599 |
|               |               |                |                | <i>CLCN3</i>   | 128,8257586  | 6,894676844    |                | <i>KCNE4</i>   | 0,749059004  | -0,516274929 |
|               |               |                |                | <i>NALCN</i>   | 9,177492075  | 3,196760178    |                | <i>CLCN3</i>   | 1,199336796  | 0,212770144  |
|               |               |                |                | <i>KCNJ10</i>  | 2,734078391  | 1,210272471    |                | <i>NALCN</i>   | 8,875269206  | 2,851837794  |
|               |               |                |                | <i>KCNB1</i>   | 1,336270569  | 0,236512661    |                | <i>KCNJ10</i>  | 1,589295573  | 0,451617241  |
|               |               |                |                | <i>CLCN6</i>   | 0,881006191  | -0,186611176   |                | <i>CLCN6</i>   | 0,852435667  | -0,230883916 |
| Downregulated | Downregulated | Downregulated  | <i>CACNA1B</i> | 0,402066592    | -1,636833827 | <i>CACNA1B</i> | 0,999821046    | -0,032211304   |              |              |
|               |               |                | <i>KCNE4</i>   | 0,386190656    | -1,684004307 | <i>CACNA1D</i> | 0,605288154    | -1,046854973   |              |              |
|               |               |                | <i>CACNA1D</i> | n.e.           | n.e.         | <i>KCNB1</i>   | 0,822269415    | -0,357221127   |              |              |
|               |               |                | <i>KCNE4</i>   | 0,918612557    | -0,271642208 | <i>KCNE4</i>   | 0,918612557    | -0,271642208   |              |              |

**Table S2** Full array map of analysis membrane receptors in U87 and Hs5 cells.

|   | A           | B       | C           | D        | E          | F           | G          | H      | I     | J      | K           | L           |
|---|-------------|---------|-------------|----------|------------|-------------|------------|--------|-------|--------|-------------|-------------|
| 1 | POS         | POS     | NEG         | NEG      | 4-1BB      | ALCAM       | CD80       | BCAM   | CD14  | CD30   | CD40 Ligand | CEACAM-1    |
| 2 | POS         | POS     | NEG         | NEG      | 4-1BB      | ALCAM       | CD80       | BCMA   | CD14  | CD30   | CD40 Ligand | CEACAM-1    |
| 3 | Dr6         | Dtk     | Endoglin    | ErbB3    | E-Selectin | Fas         | Flt-3      | GITR   | HVEM  | ICAM-3 | IL-1 R4     | IL-1 R1     |
| 4 | Dr6         | Dtk     | Endoglin    | ErbB3    | E-Selectin | Fas         | Flt-3      | GITR   | HVEM  | ICAM-3 | IL-1 R4     | IL-1 R1     |
| 5 | IL-10R beta | IL-17RA | IL-1R gamma | IL-21R   | LIMPII     | Lipocalin-2 | L-Selectin | LYVE-1 | MICA  | MICB   | NRG-1 beta  | PDGF R beta |
| 6 | IL-10R beta | IL-17RA | IL-1R gamma | IL-21R   | LIMPII     | Lipocalin-2 | L-Selectin | LYVE-1 | MICA  | MICB   | NRG-1 beta  | PDGF R beta |
| 7 | PEACAM-1    | RAGE    | TM-1        | TRAIL R3 | Trappin-2  | uPar        | VAM-1      | XEDAR  | BLANK | BLANK  | BLANK       | POS         |
| 8 | PEACAM-1    | RAGE    | TM-1        | TRAIL R3 | Trappin-2  | uPar        | VAM-1      | XEDAR  | BLANK | BLANK  | BLANK       | POS         |

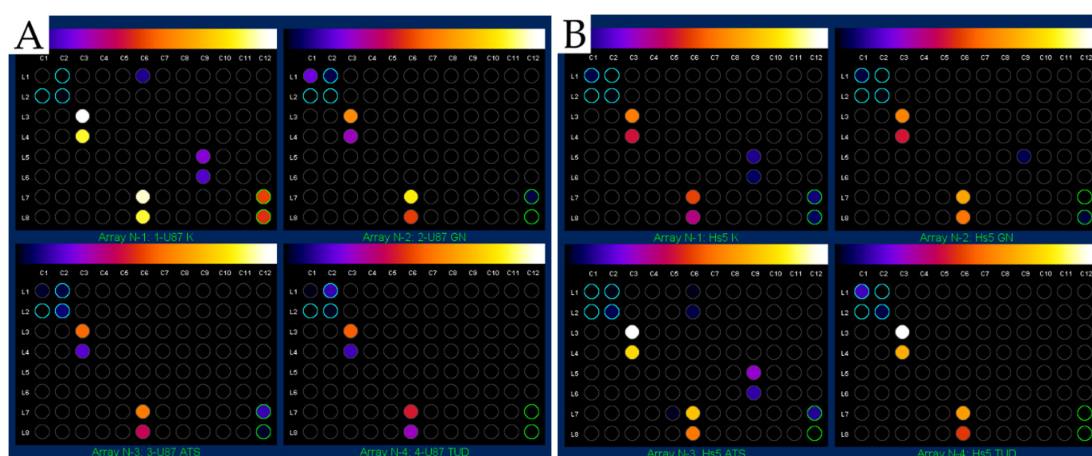

**Figure S1** Antibody array analysis of human cell membrane receptor in U87 glioma cells (A) and Hs5 fibroblast cells (B) with or without treatment (K; control) with graphene flakes (GN/ExF) and two types of reduced graphene oxides (rGO/ATS and rGO/TUD). The results shown in the figure were obtained by analysis in ImageJ. The dots with the location (C3-L3, C3-L4) indicate the expression Endoglin (CD105), (C6-L7, C6-L8) indicate uPar (CD87), and (C9-L5, C9-L6) indicate MICA.
